# Supplementary material for: Upregulation of the Oct3/4 Network in Basal Breast Cancer Is Associated with Its Metastatic Potential and Shows Tissue Dependent Variability
Source: MDPI journal article supplement (doi:10.3390/ijms24119142), 2023-05-23
Supplement: s1 [file s1]

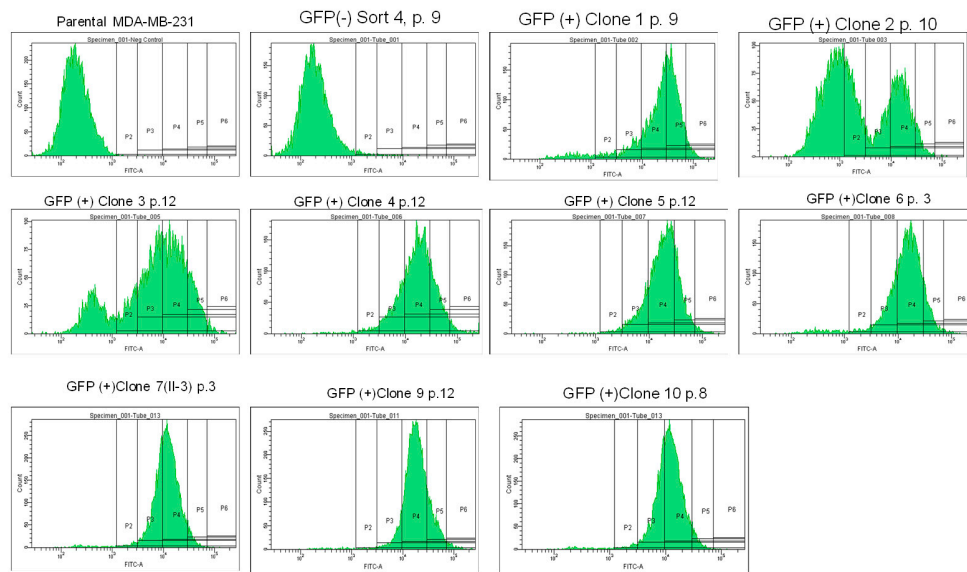

| Clones | GFP <sup>-</sup><br>P2 > 10 <sup>3</sup> | GFP <sup>-</sup><br>P3 > 10 <sup>3</sup> | GFP <sup>-</sup><br>P4 > 10 <sup>3</sup> | GFP <sup>+</sup><br>P5 > 10 <sup>3</sup> | GFP <sup>+</sup><br>P6 > 10 <sup>3</sup> |
|--------|------------------------------------------|------------------------------------------|------------------------------------------|------------------------------------------|------------------------------------------|
| Par    | 0.2                                      | 0                                        | 0                                        | 0                                        | 0                                        |
| GFP    | 1.7                                      | 0.1                                      | 0                                        | 0                                        | 0                                        |
| 1      | 95.6                                     | 92.8                                     | 84.8                                     | 47.5                                     | 4.8                                      |
| 2      | 58.6                                     | 38.0                                     | 27.6                                     | 3.8                                      | 0.1                                      |
| 3      | 83.5                                     | 74.4                                     | 47.0                                     | 13.8                                     | 1.2                                      |
| 4      | 99.1                                     | 96.8                                     | 78.7                                     | 24.1                                     | 3.0                                      |
| 5      | 99.7                                     | 98.3                                     | 84.1                                     | 24.3                                     | 1.6                                      |
| 6      | 96.8                                     | 94.7                                     | 75.2                                     | 12.6                                     | 0.7                                      |
| 7      | 98.9                                     | 97.1                                     | 66.6                                     | 4.6                                      | 0.1                                      |
| 9      | 99.1                                     | 98.5                                     | 91.1                                     | 19.9                                     | 1.8                                      |
| 10     | 96.5                                     | 95.3                                     | 89.8                                     | 33.0                                     | 1.4                                      |

**Supplemental Figure S1:** MDA-MB-231 cell line transfected with *Oct3/4*-GFP were screened using GFP fluorescence with FACS. Selected GFP+ clones were cultured in conventional media and growth conditions and assessed for the stability and uniformity of GFP fluorescence as a measure of intra-clonal heterogeneity. (Par=Parental MDA-MB-231 Cell line)

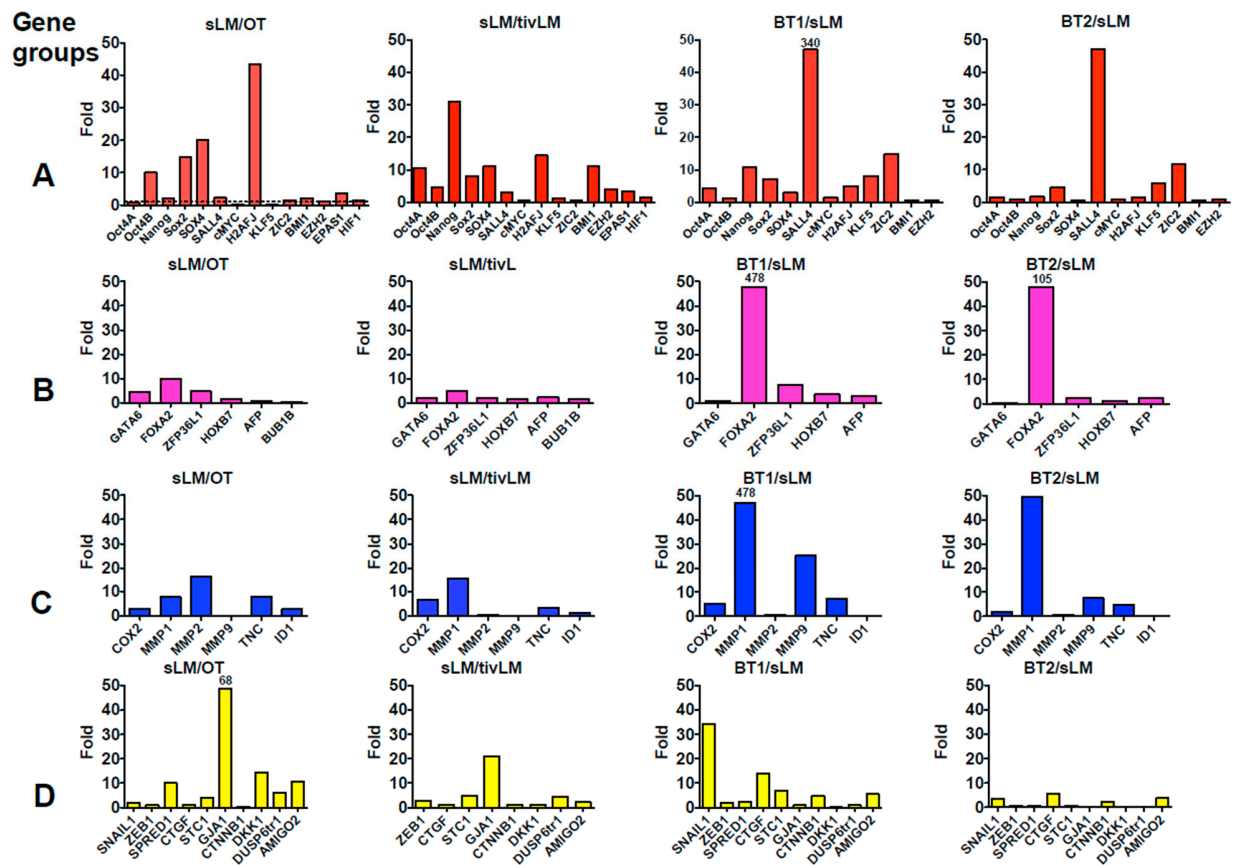

**Supplemental Figure S2:** Heterogeneity of Oct 3/4 GFP expression and related transcriptome within primary tumors and metastatic lesions in different tissues. qRT-PCR analysis of differentially expressed genes of the OCT3/4 network in the GFP+ cells compared to GFP- cells within primary tumors and metastasis in different tissues. Set of genes based on similarity in known functions are organized into Gene groups (A-D). Within each group (A-D), Fold changes of each gene is with respect to the housekeeping genes presented as a ratio of spontaneous lung metastasis (sLM), orthotopic (OT) and brain tumor directly implanted (BT1-BT2) and Tail vein injection of tumor cells establishing in Lungs (tivLM). This figure is supplement to figure 4 in the manuscript.
